# Supplementary material
Source: publisher figshare collection journal article supplement (https://acs.figshare.com/ndownloader/files/4666831)

## Supporting Information

# Revealing the way of self-complementary dimerization for a shape-persistent macrocycle using DFT calculations

Man-Fai Ng and Shuo-Wang Yang

Institute of High Performance Computing, 1 Science Park Road, Singapore 117528, Singapore

Figure S1. Total energy as a function of (a) rotational angle and (b) intermolecular distance. Counterpoise (CP) corrected and uncorrected total energies are denoted as ▲ and ▼. In (a), the total energies are calculated at intermolecular distance of 3.70 Å (dotted lines) and 3.91 Å (solid lines). In (b), both the CP-corrected and uncorrected total energies are calculated with the off-set angle  $\theta = 51.5^\circ$ . The two energy profiles would merge at  $d \sim 7$  Å, indicating that the BSSE for the non-bonded interactions has a long range effect.

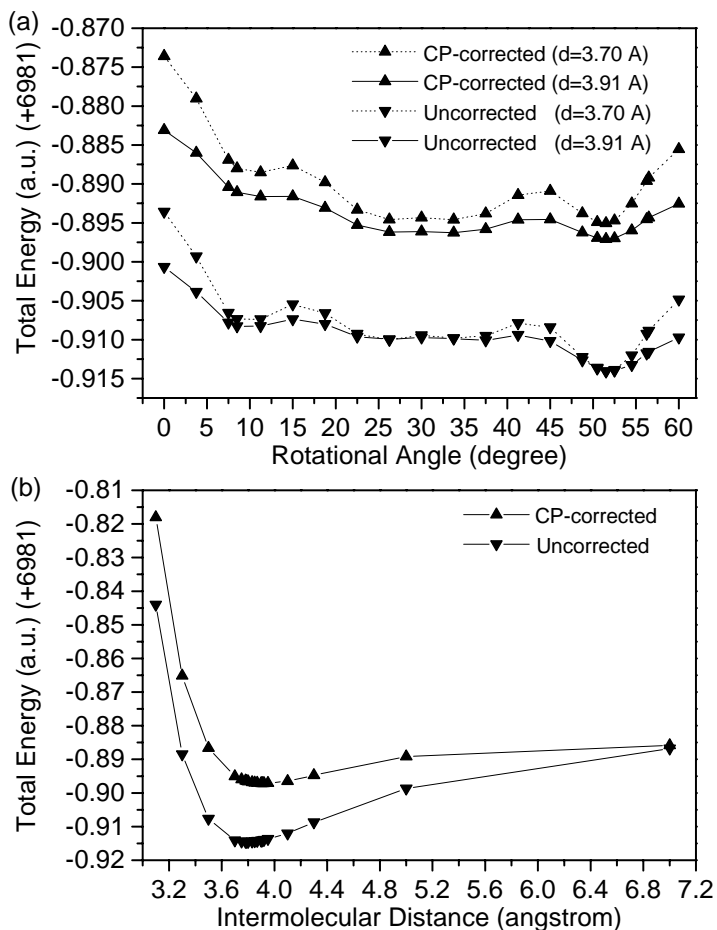

Figure S2. Basis set superposition error (BSSE) as a function of (a) rotational angle and (b) intermolecular distance. In (a), the intermolecular distance is 3.91 Å. In (b), the off-set angle is 51.5°.

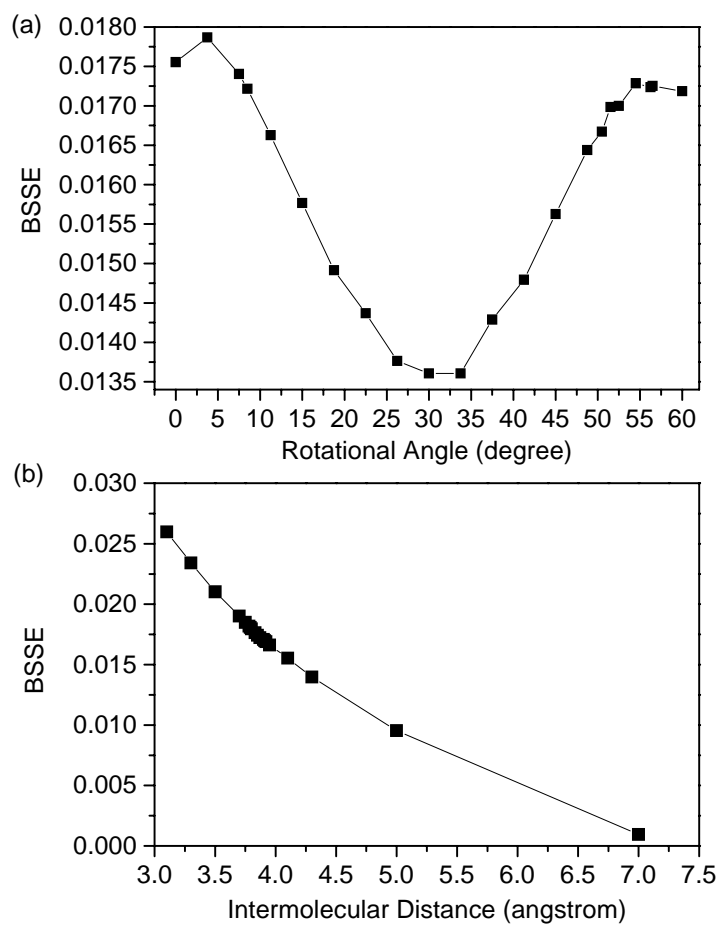

Supplement: Supplementary file 1 [file 4666831]
